# Supplementary material for: TEOA-induced in situ formation of wurtzite and zinc-blende CdS heterostructures as a highly active and long-lasting photocatalyst for converting CO2 into solar fuel
Source: Royal Society of Chemistry journal article supplement (doi:10.1039/c8cy00274f), 2018-01-01
Supplement: c8cy00274f1.pdf [file c8cy00274f1.pdf]

## Supplementary Information

**TEOA-induced in situ formation of wurtzite and zinc-blende CdS heterstructures as  
a high-active and long-lasting photocatalyst for converting CO<sub>2</sub> into solar fuel**

Yao Chai, Jiaxue Lu, Li Li,\* Deli Li, Meng Li, and Jun Liang\*

State Key Laboratory of High-efficiency Utilization of Coal and Green Chemical Engineering,

College of Chemistry and Chemical Engineering, Ningxia University, *Yinchuan 750021, China.*

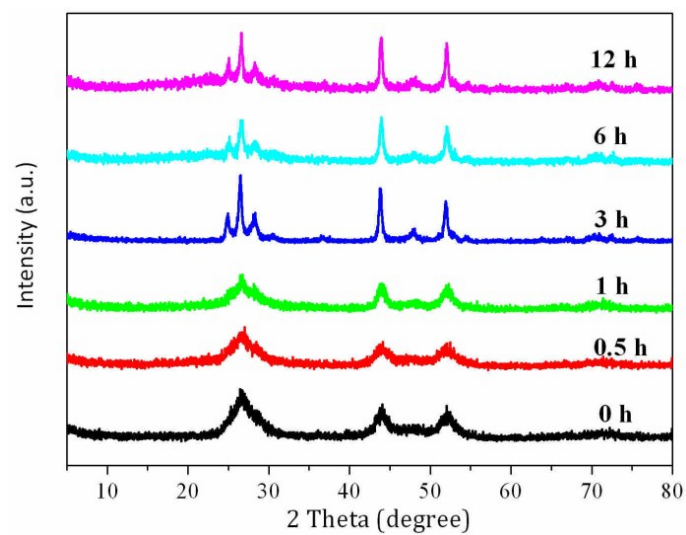

**Figure S1.** The XRD patterns of the products prepared at different hydrothermal treatment time.

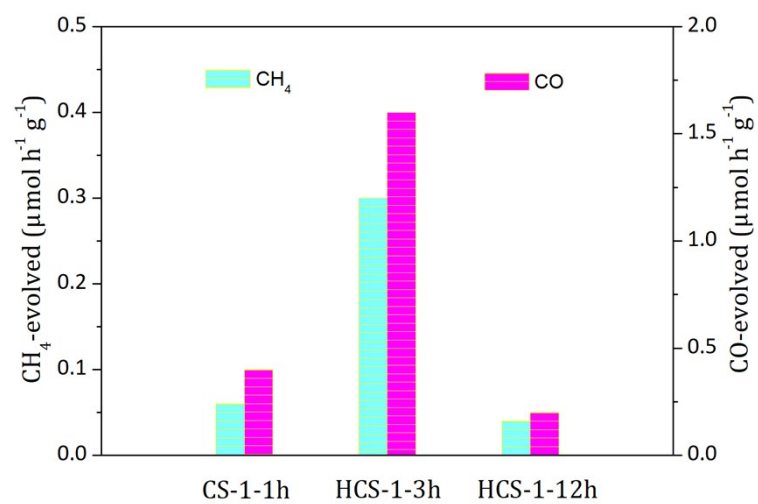

**Figure S2.** The photocatalytic CO-/CH<sub>4</sub>-producing rate of heterostructured samples with different hydrothermal reaction time under visible-light irradiation ( $\lambda \geq 420$  nm).

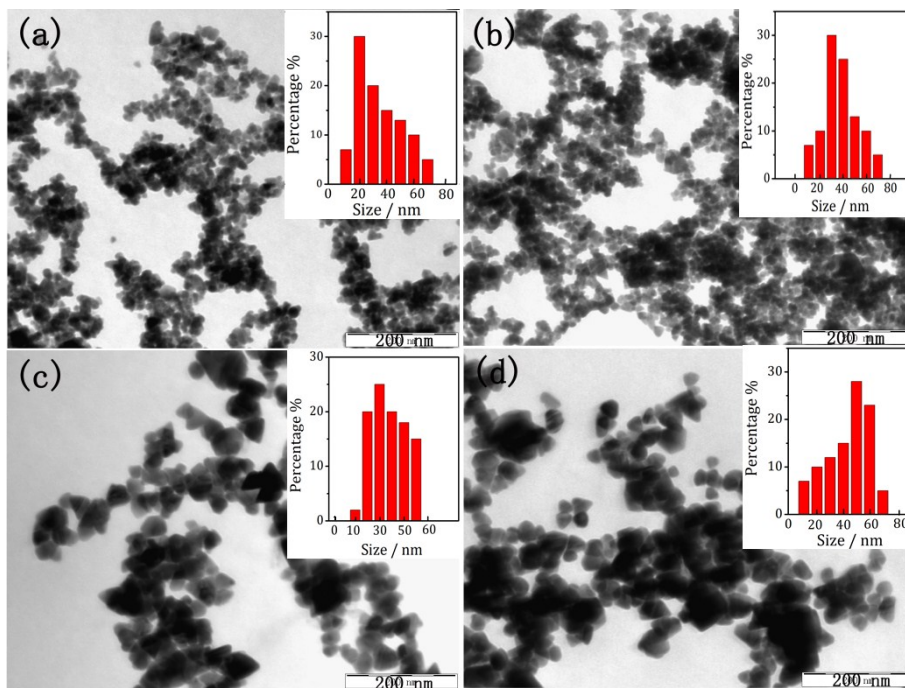

**Figure S3.** The TEM images of the CdS products prepared at different TEOA amounts of 0.5 g (a), 1.0 g (b), 3.0 g (c), and 5.0 g (d).

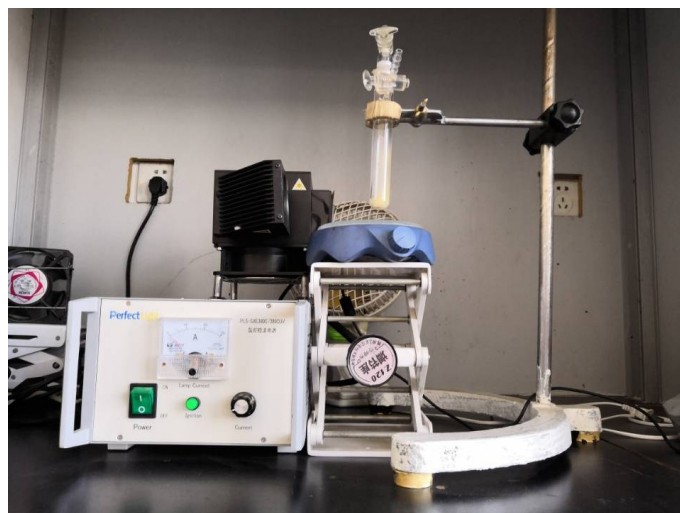

**Figure S4.** The photo of the setup for CO<sub>2</sub> reduction.
